# Supplementary material for: Climatic and socioeconomic effects on land cover changes across Europe: Does protected area designation matter?
Source: PubMed Central journal article supplement (PMC6636817; doi:10.1371/journal.pone.0219374), 2019-07-17
Supplement: pone.0219374.s001.pdf [file pone.0219374.s001.pdf]

# S1 Appendix: Maps of land cover flows (LCF1-LCF6) from 2000 to 2012 per NUTS3 region.

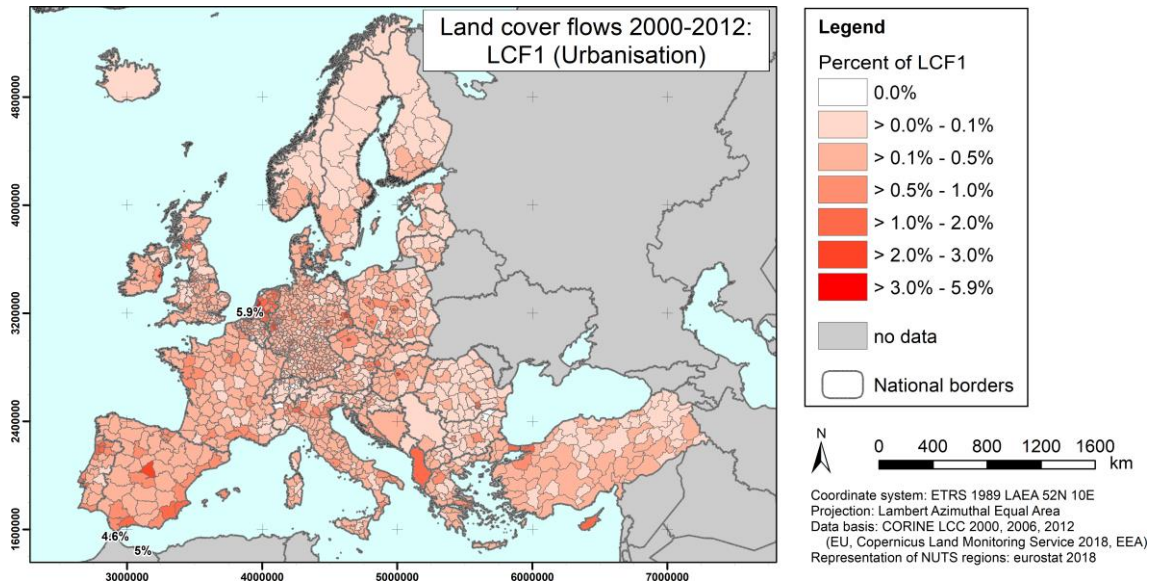

**Fig A. Share of LCF1 (Urbanisation) 2000 to 2012 per NUTS3 region.**

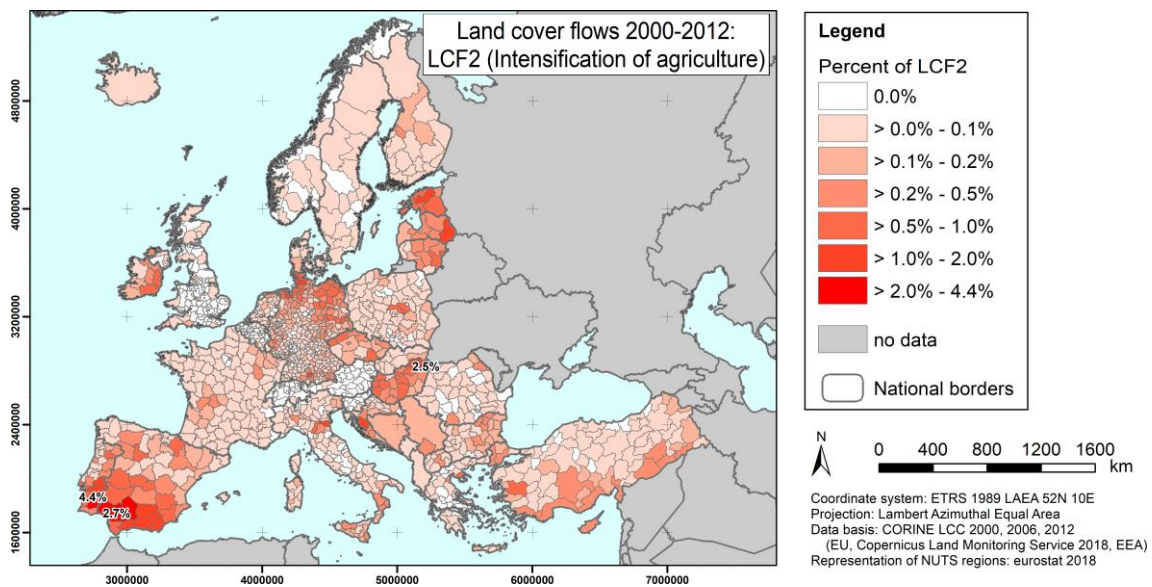

**Fig B. Share of LCF2 (Intensification of agriculture) 2000 to 2012 per NUTS3 region.**

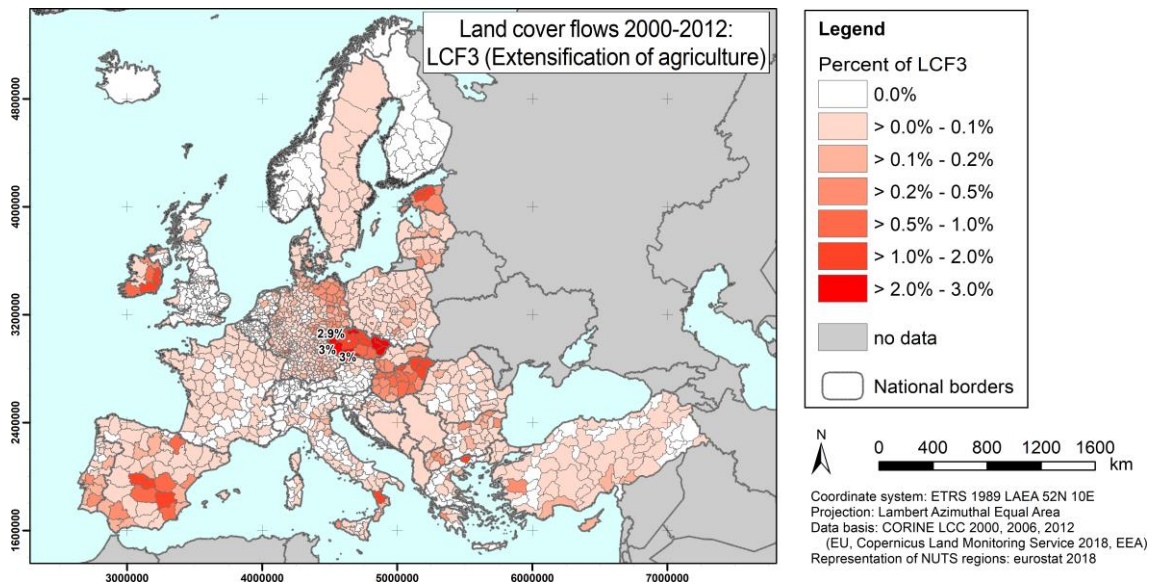

**Fig C. Share of LCF3 (Extensification of agriculture) 2000 to 2012 per NUTS3**

**region.**

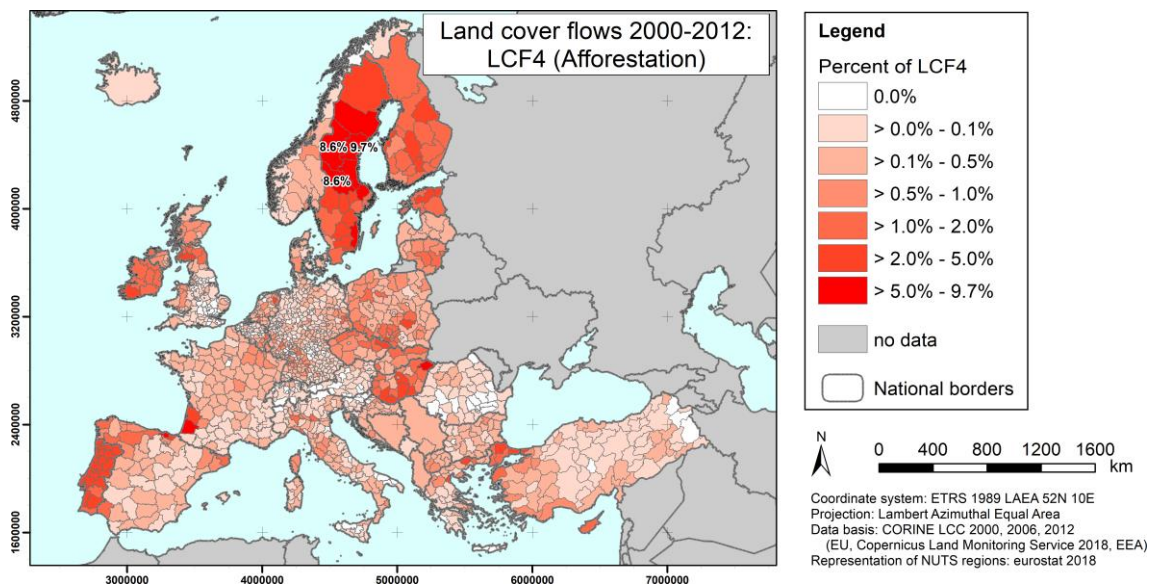

**Fig D. Share of LCF4 (Afforestation) 2000 to 2012 per NUTS3 region.**

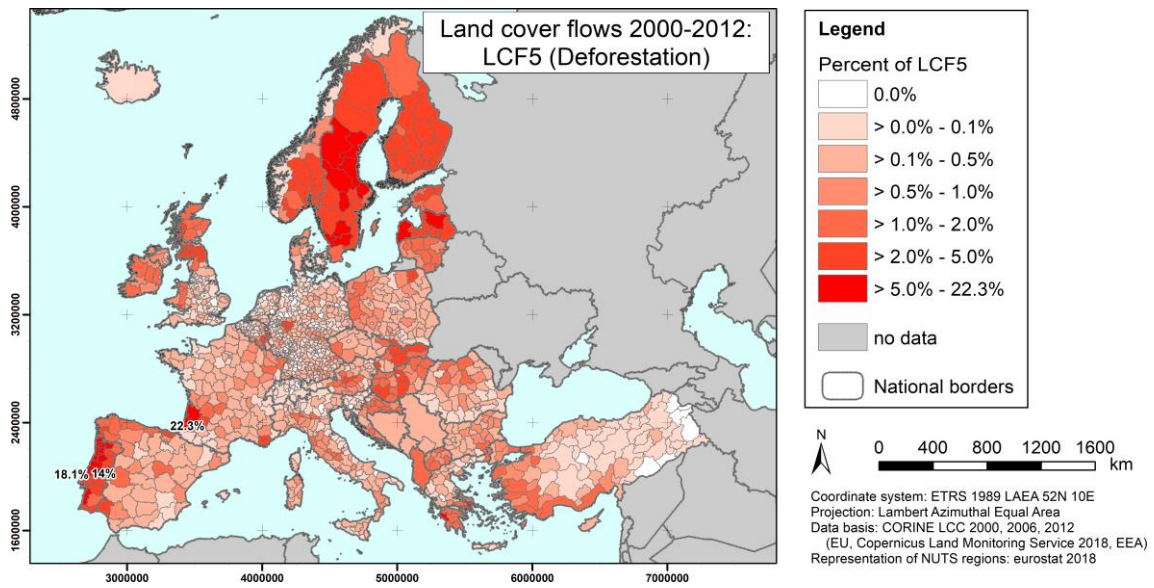

**Fig E. Share of LCF5 (Deforestation) 2000 to 2012 per NUTS3 region.**

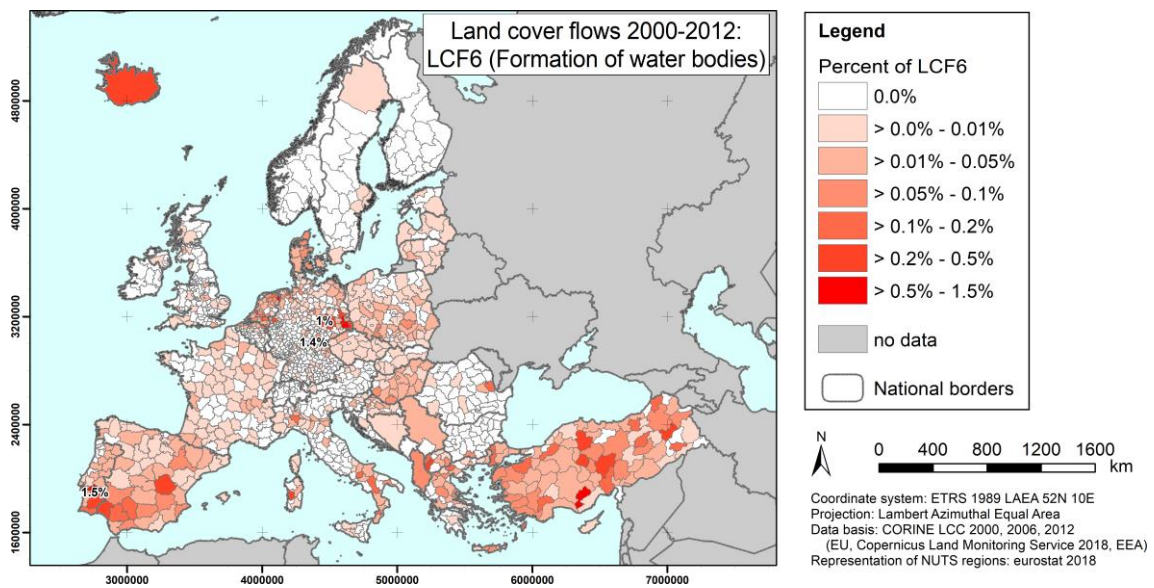

**Fig F. Share of LCF6 (Formation of water bodies) 2000 to 2012 per NUTS3 region.**
