# Supplementary material for: Climatic and socioeconomic effects on land cover changes across Europe: Does protected area designation matter?
Source: PubMed Central journal article supplement (PMC6636817; doi:10.1371/journal.pone.0219374), 2019-07-17
Supplement: pone.0219374.s002.pdf [file pone.0219374.s002.pdf]

# S2 Appendix: Maps of the spatial distribution of climatic and socioeconomic factors per NUTS3 region.

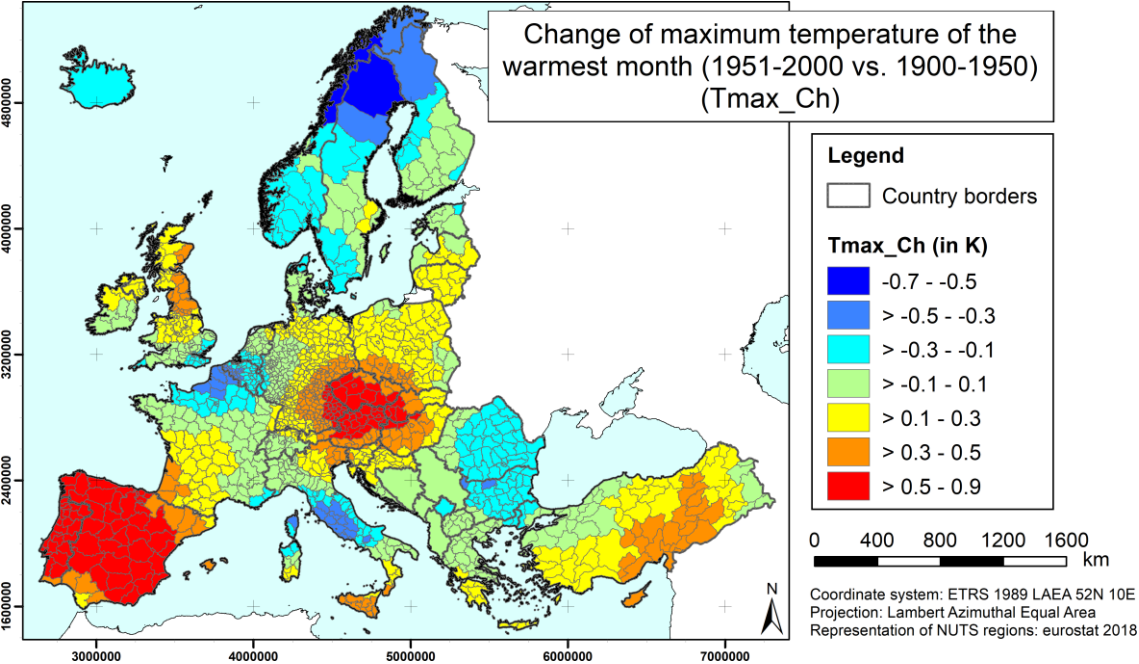

**Fig A. Spatial distribution of the change of maximum temperature of the warmest month (1951-2000 vs. 1900-1950) (Tmax\_Ch).** Calculated based on data from Reference [42].

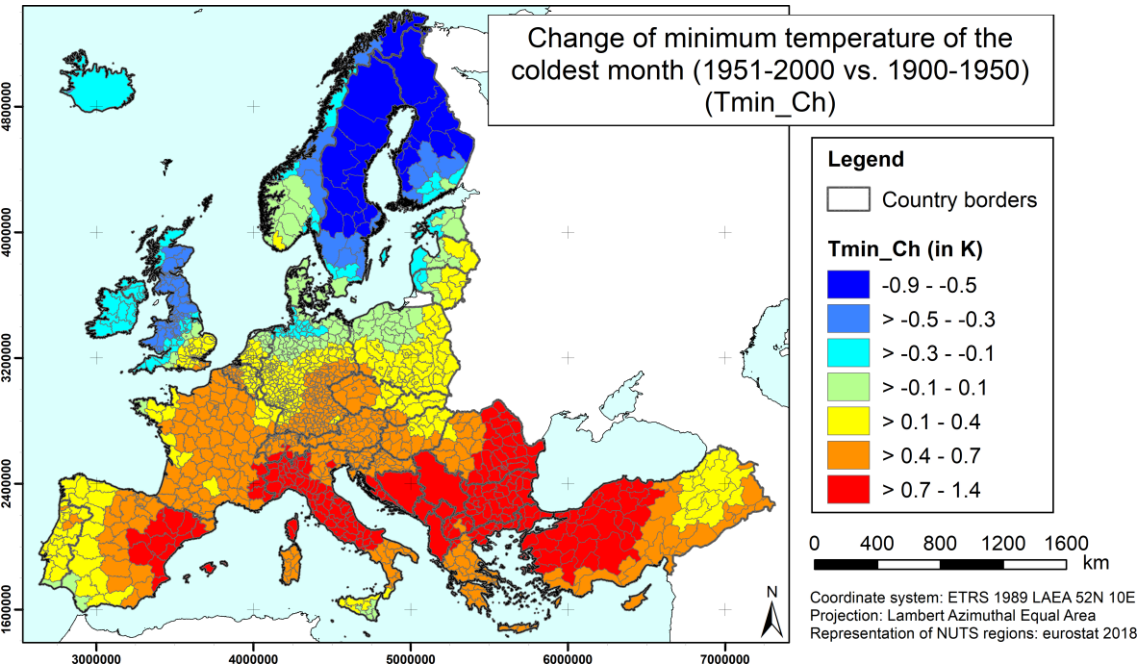

**Fig B. Spatial distribution of the change of minimum temperature of the coldest month (1951-2000 vs. 1900-1950) (Tmin\_Ch).** Calculated based on data from Reference [42].

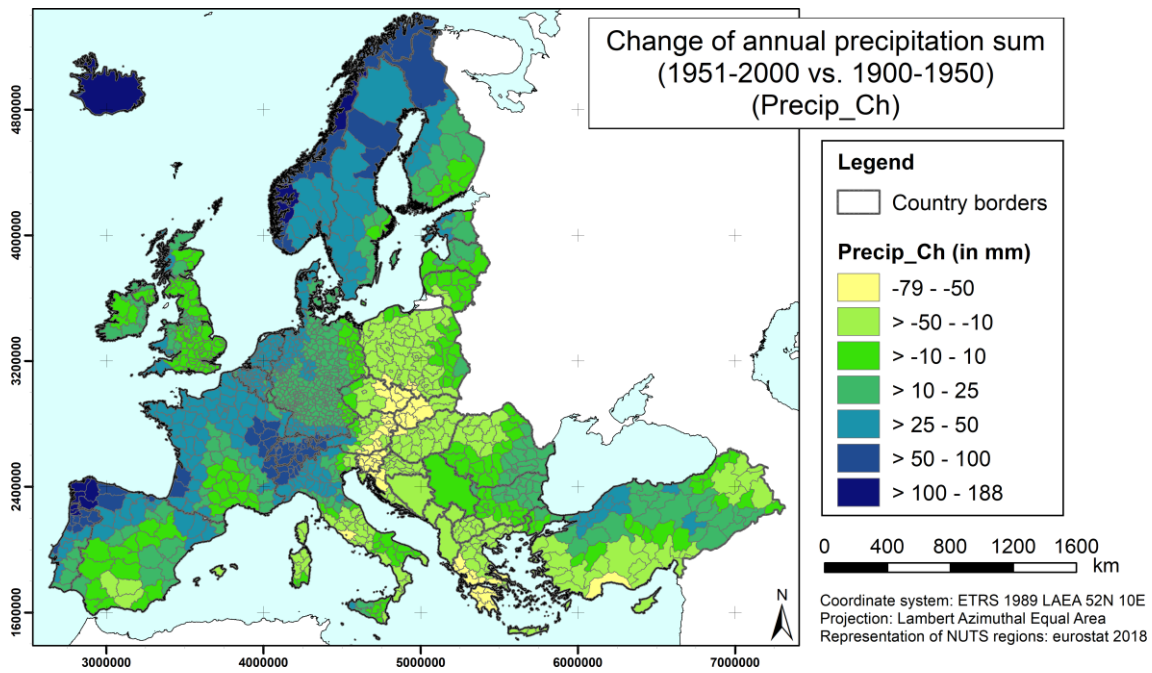

**Fig C. Spatial distribution of the change of annual precipitation sum (1951-2000 vs. 1900-1950) (Precip\_Ch).** Calculated based on data from Reference [42].

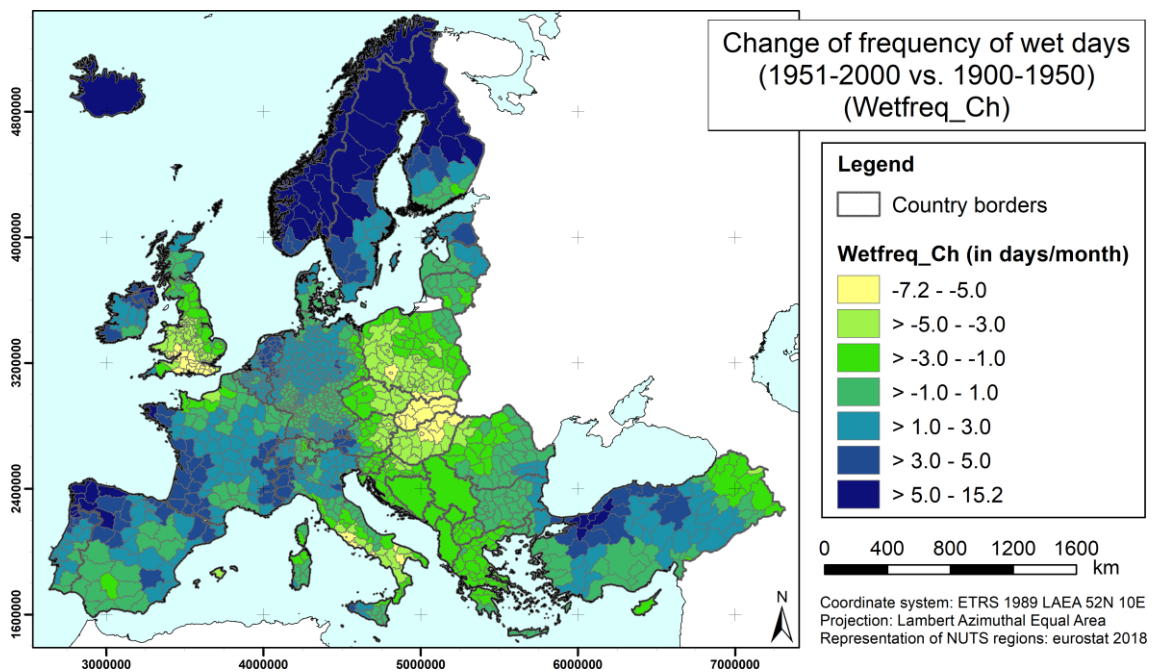

**Fig D. Spatial distribution of the change of frequency of wet days (1951-2000 vs. 1900-1950) (Wetfreq\_Ch).** Calculated based on data from Reference [42].

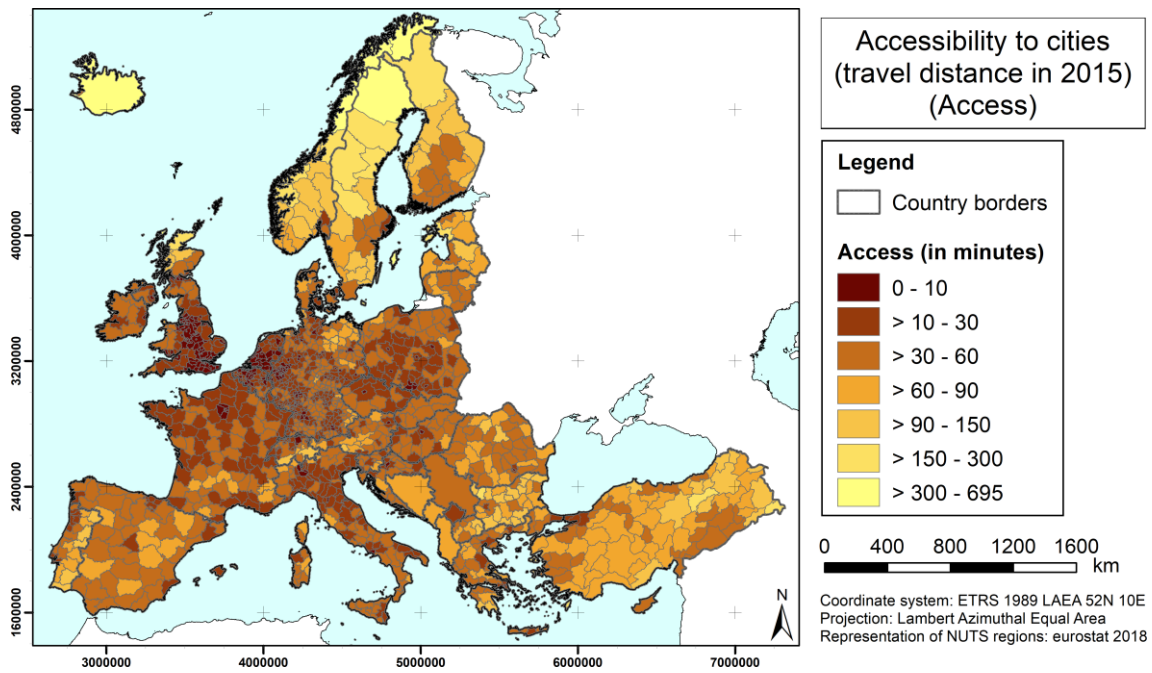

**Fig E. Spatial distribution of the accessibility to cities (travel distance in 2015) (Access).** Data from Reference [44].

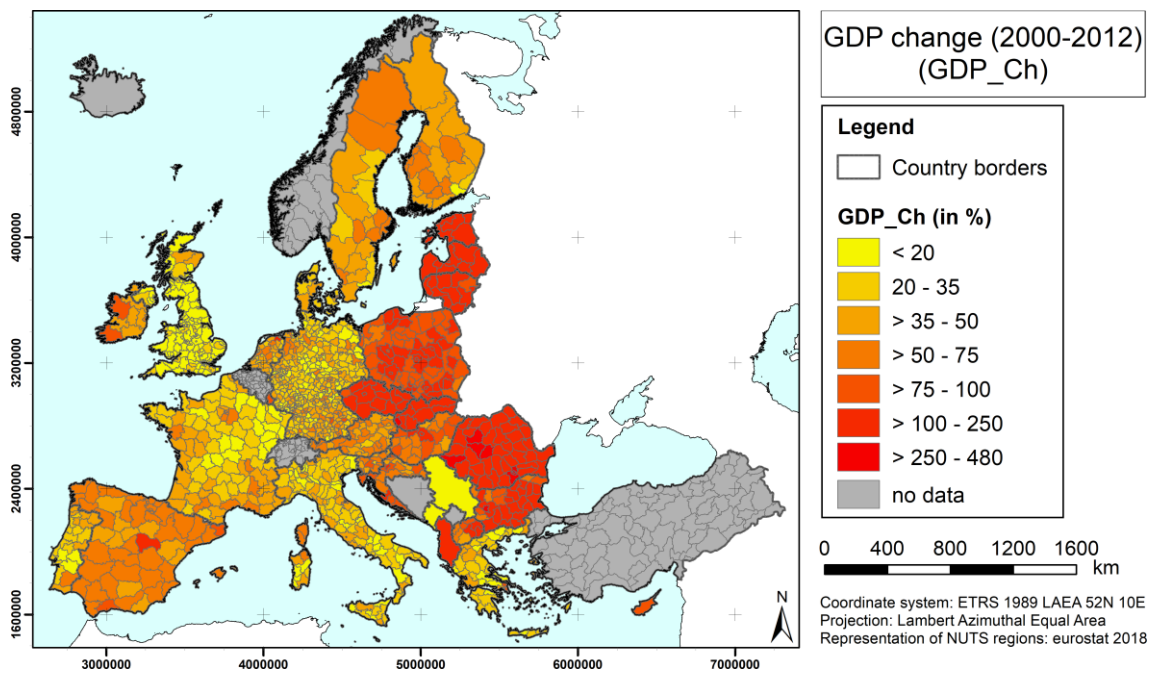

**Fig F. Spatial distribution of the GDP change (2000-2012) (GDP\_Ch).** Calculated based on data from Reference [45].

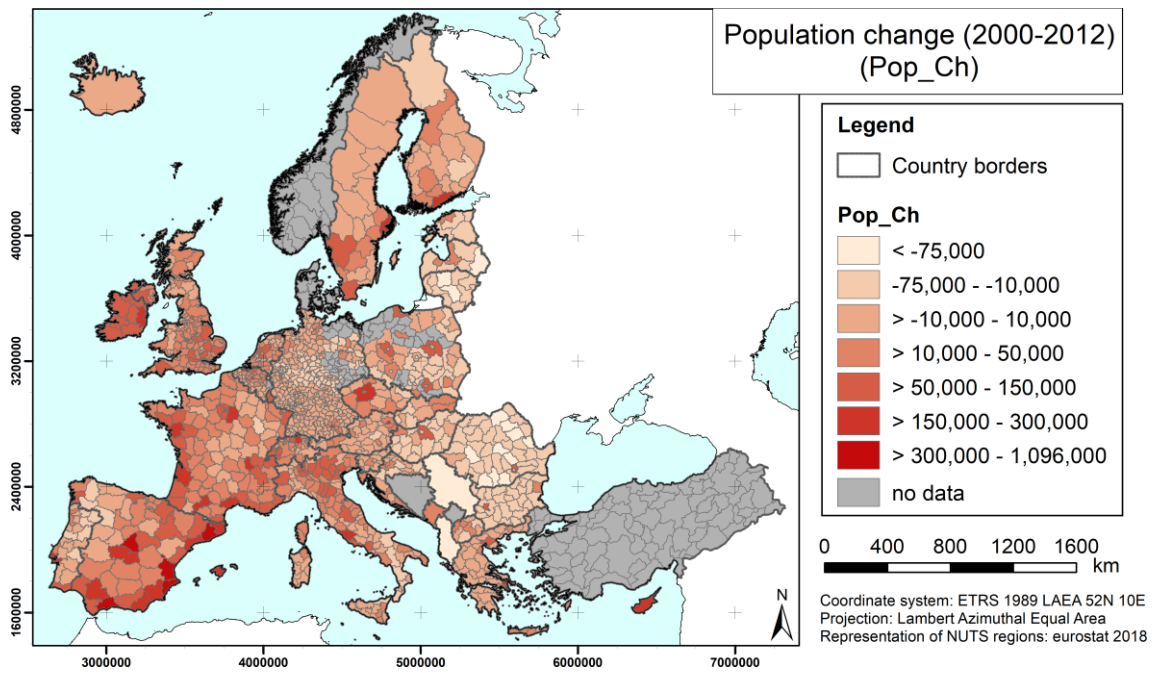

**Fig G. Spatial distribution of the population change (2000-2012) (Pop\_Ch).**

Calculated based on data from References [46,47].

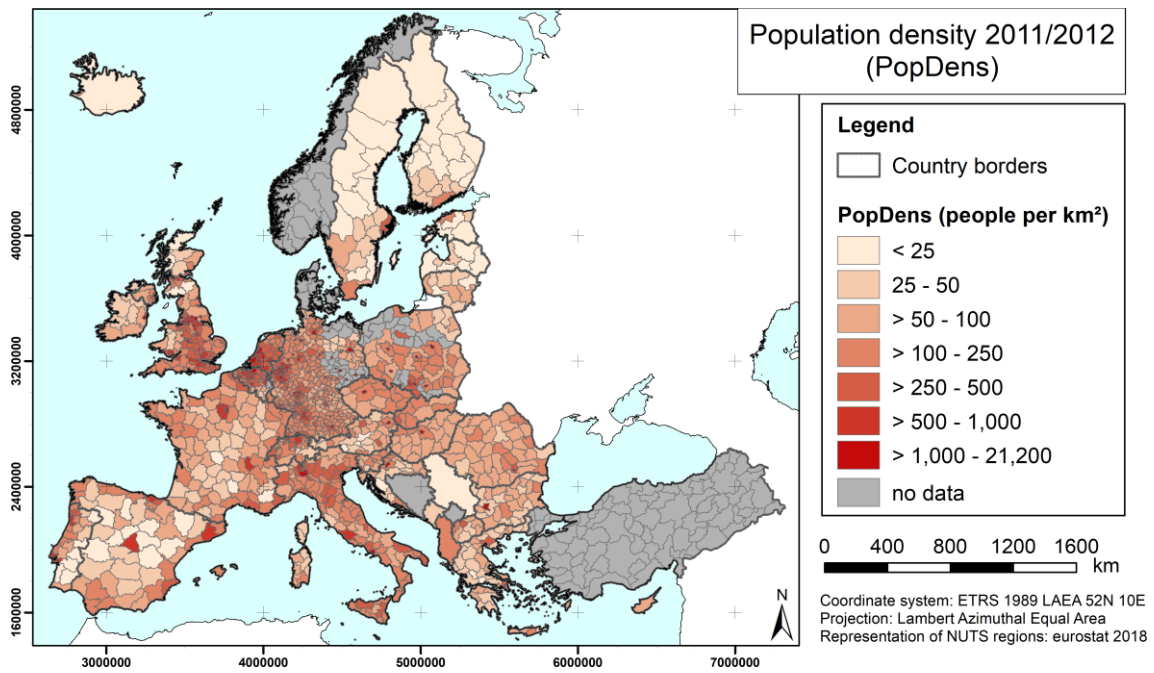

**Fig H. Spatial distribution of the population density 2011/2012 (PopDens). Data**

from References [46,47].

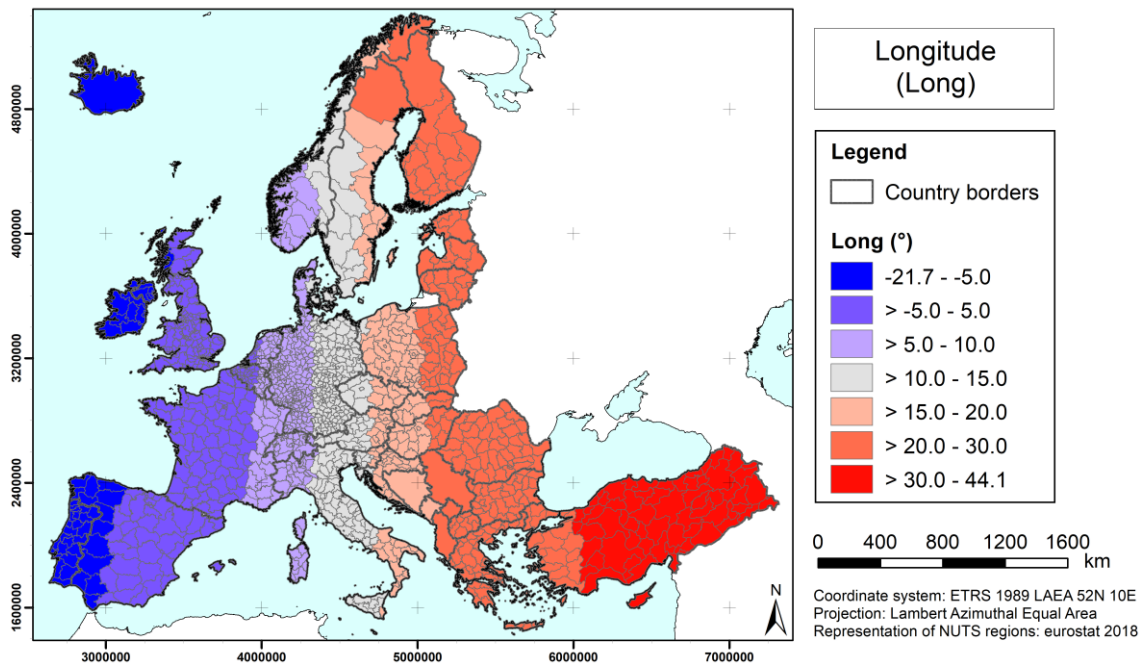

**Fig I. Spatial distribution of the longitude (Long).**

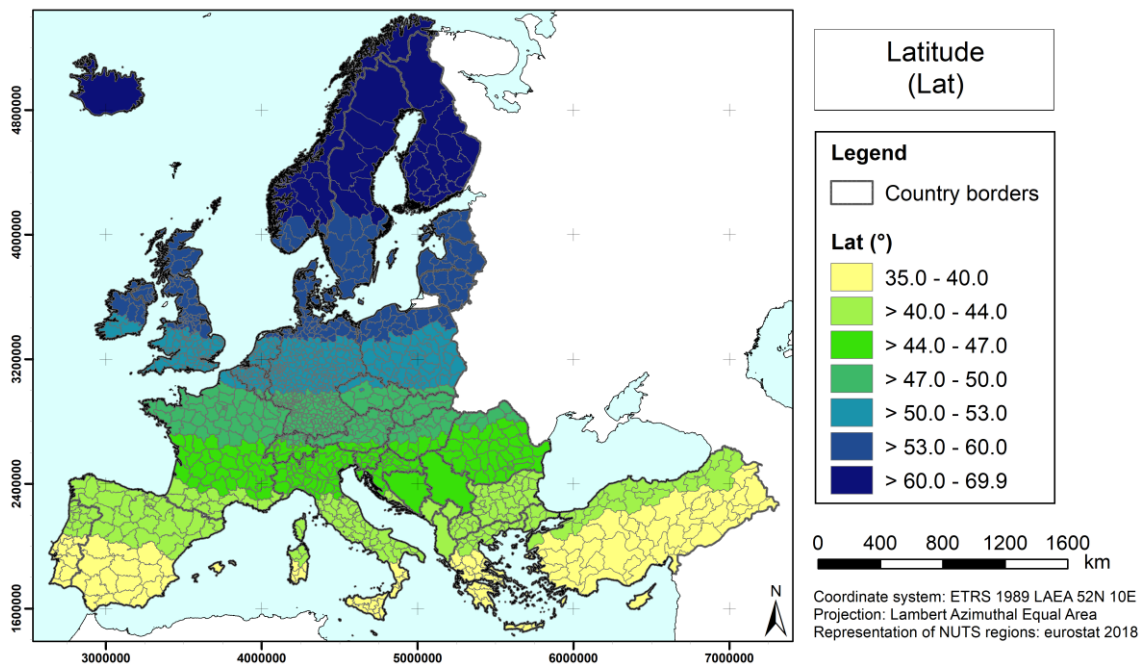

**Fig J. Spatial distribution of the latitude (Lat).**

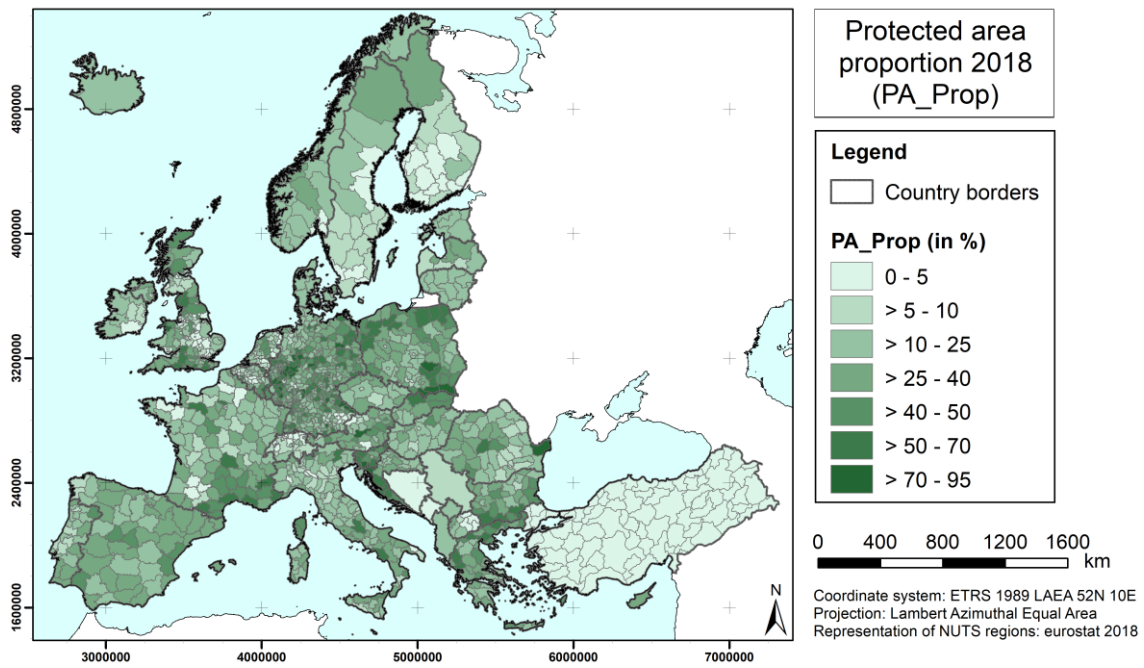

**Fig K. Spatial distribution of the protected area proportion (PA\_Prop).** Calculated based on data from References [39,40].
