# Supplementary material for: Climatic and socioeconomic effects on land cover changes across Europe: Does protected area designation matter?
Source: PubMed Central journal article supplement (PMC6636817; doi:10.1371/journal.pone.0219374), 2019-07-17
Supplement: pone.0219374.s003.pdf [file pone.0219374.s003.pdf]

### S3 Appendix: Distribution of input values for modelling of land cover flows (LCF1-LCF6) with different thresholds for binary coding

**Table A.** Distribution of input values for modelling of land cover flows (LCF1-LCF6) with different thresholds for binary coding on NUTS3 level (1470 regions in total)

| Land cover flow/<br>Threshold for<br>binary coding | Protected areas |      |            | Non-protected areas |      |            | 1 km protected area<br>buffers |      |            |
|----------------------------------------------------|-----------------|------|------------|---------------------|------|------------|--------------------------------|------|------------|
|                                                    | Zeros           | Ones | No<br>data | Zeros               | Ones | No<br>data | Zeros                          | Ones | No<br>data |
| <b>LCF1</b>                                        |                 |      |            |                     |      |            |                                |      |            |
| 0                                                  | 428             | 978  | 64         | 55                  | 1415 | 0          | 125                            | 1284 | 61         |
| 0.05 quantile                                      | 476             | 930  | 64         | 125                 | 1345 | 0          | 189                            | 1220 | 61         |
| 0.1 quantile                                       | 525             | 881  | 64         | 196                 | 1274 | 0          | 253                            | 1156 | 61         |
| 0.25 quantile                                      | 672             | 734  | 64         | 409                 | 1061 | 0          | 446                            | 963  | 61         |
| <b>LCF2</b>                                        |                 |      |            |                     |      |            |                                |      |            |
| 0                                                  | 786             | 620  | 64         | 512                 | 958  | 0          | 688                            | 721  | 61         |
| 0.05 quantile                                      | 817             | 589  | 64         | 559                 | 911  | 0          | 724                            | 685  | 61         |
| 0.1 quantile                                       | 848             | 558  | 64         | 607                 | 863  | 0          | 760                            | 649  | 61         |
| 0.25 quantile                                      | 941             | 465  | 64         | 751                 | 719  | 0          | 868                            | 541  | 61         |
| <b>LCF3</b>                                        |                 |      |            |                     |      |            |                                |      |            |
| 0                                                  | 956             | 450  | 64         | 660                 | 810  | 0          | 829                            | 580  | 61         |
| 0.05 quantile                                      | 978             | 428  | 64         | 700                 | 770  | 0          | 858                            | 551  | 61         |
| 0.1 quantile                                       | 1001            | 405  | 64         | 741                 | 729  | 0          | 887                            | 522  | 61         |
| 0.25 quantile                                      | 1068            | 338  | 64         | 862                 | 608  | 0          | 974                            | 435  | 61         |
| <b>LCF4</b>                                        |                 |      |            |                     |      |            |                                |      |            |
| 0                                                  | 457             | 949  | 64         | 394                 | 1076 | 0          | 510                            | 899  | 61         |
| 0.05 quantile                                      | 504             | 902  | 64         | 447                 | 1023 | 0          | 555                            | 854  | 61         |
| 0.1 quantile                                       | 552             | 854  | 64         | 501                 | 969  | 0          | 600                            | 809  | 61         |
| 0.25 quantile                                      | 694             | 712  | 64         | 663                 | 807  | 0          | 735                            | 674  | 61         |
| <b>LCF5</b>                                        |                 |      |            |                     |      |            |                                |      |            |
| 0                                                  | 375             | 1031 | 64         | 326                 | 1144 | 0          | 424                            | 985  | 61         |
| 0.05 quantile                                      | 426             | 980  | 64         | 383                 | 1087 | 0          | 473                            | 936  | 61         |
| 0.1 quantile                                       | 478             | 928  | 64         | 440                 | 1030 | 0          | 522                            | 887  | 61         |
| 0.25 quantile                                      | 633             | 773  | 64         | 612                 | 858  | 0          | 670                            | 739  | 61         |
| <b>LCF6</b>                                        |                 |      |            |                     |      |            |                                |      |            |
| 0                                                  | 1102            | 304  | 64         | 998                 | 472  | 0          | 1154                           | 255  | 61         |
| 0.05 quantile                                      | 1117            | 289  | 64         | 1021                | 449  | 0          | 1166                           | 243  | 61         |
| 0.1 quantile                                       | 1132            | 274  | 64         | 1045                | 425  | 0          | 1179                           | 230  | 61         |
| 0.25 quantile                                      | 1178            | 228  | 64         | 1116                | 354  | 0          | 1218                           | 191  | 61         |

**Table B.** Distribution of input values for modelling of land cover flows (LCF1-LCF6) with different thresholds for binary coding on LAU level (127102 regions in total)

| Land cover flow/<br>Threshold for<br>binary coding | Protected areas |       |            | Non-protected areas |       |            | 1 km protected area<br>buffers |       |            |
|----------------------------------------------------|-----------------|-------|------------|---------------------|-------|------------|--------------------------------|-------|------------|
|                                                    | Zeros           | Ones  | No<br>data | Zeros               | Ones  | No<br>data | Zeros                          | Ones  | No<br>data |
| <b>LCF1</b>                                        |                 |       |            |                     |       |            |                                |       |            |
| 0                                                  | 71989           | 4946  | 50167      | 91922               | 28539 | 6641       | 71391                          | 12676 | 43035      |
| 0.05 quantile                                      | 72236           | 4699  | 50167      | 93349               | 27112 | 6641       | 72025                          | 12042 | 43035      |
| 0.1 quantile                                       | 72483           | 4452  | 50167      | 94776               | 25685 | 6641       | 72658                          | 11409 | 43035      |
| 0.25 quantile                                      | 73226           | 3709  | 50167      | 99057               | 21404 | 6641       | 74560                          | 9507  | 43035      |
| <b>LCF2</b>                                        |                 |       |            |                     |       |            |                                |       |            |
| 0                                                  | 73346           | 3589  | 50167      | 108110              | 12351 | 6641       | 78645                          | 5422  | 43035      |
| 0.05 quantile                                      | 73525           | 3410  | 50167      | 108727              | 11734 | 6641       | 78916                          | 5151  | 43035      |
| 0.1 quantile                                       | 73705           | 3230  | 50167      | 109345              | 11116 | 6641       | 79187                          | 4880  | 43035      |
| 0.25 quantile                                      | 74243           | 2692  | 50167      | 111198              | 9263  | 6641       | 80000                          | 4067  | 43035      |
| <b>LCF3</b>                                        |                 |       |            |                     |       |            |                                |       |            |
| 0                                                  | 74546           | 2389  | 50167      | 111815              | 8646  | 6641       | 80324                          | 3743  | 43035      |
| 0.05 quantile                                      | 74665           | 2270  | 50167      | 112247              | 8214  | 6641       | 80511                          | 3556  | 43035      |
| 0.1 quantile                                       | 74785           | 2150  | 50167      | 112679              | 7782  | 6641       | 80698                          | 3369  | 43035      |
| 0.25 quantile                                      | 75143           | 1792  | 50167      | 113976              | 6485  | 6641       | 81260                          | 2807  | 43035      |
| <b>LCF4</b>                                        |                 |       |            |                     |       |            |                                |       |            |
| 0                                                  | 67959           | 8976  | 50167      | 101697              | 18764 | 6641       | 75416                          | 8651  | 43035      |
| 0.05 quantile                                      | 68407           | 8528  | 50167      | 102635              | 17826 | 6641       | 75848                          | 8219  | 43035      |
| 0.1 quantile                                       | 68856           | 8079  | 50167      | 103573              | 16888 | 6641       | 76284                          | 7783  | 43035      |
| 0.25 quantile                                      | 70203           | 6732  | 50167      | 106388              | 14073 | 6641       | 77579                          | 6488  | 43035      |
| <b>LCF5</b>                                        |                 |       |            |                     |       |            |                                |       |            |
| 0                                                  | 63905           | 13030 | 50167      | 95808               | 24653 | 6641       | 72697                          | 11370 | 43035      |
| 0.05 quantile                                      | 64556           | 12379 | 50167      | 97040               | 23421 | 6641       | 73265                          | 10802 | 43035      |
| 0.1 quantile                                       | 65208           | 11727 | 50167      | 98273               | 22188 | 6641       | 73834                          | 10233 | 43035      |
| 0.25 quantile                                      | 67162           | 9773  | 50167      | 101973              | 18488 | 6641       | 75539                          | 8528  | 43035      |
| <b>LCF6</b>                                        |                 |       |            |                     |       |            |                                |       |            |
| 0                                                  | 76264           | 671   | 50167      | 118926              | 1535  | 6641       | 83571                          | 496   | 43035      |
| 0.05 quantile                                      | 76297           | 638   | 50167      | 119002              | 1459  | 6641       | 83595                          | 472   | 43035      |
| 0.1 quantile                                       | 76331           | 604   | 50167      | 119079              | 1382  | 6641       | 83620                          | 447   | 43035      |
| 0.25 quantile                                      | 76432           | 503   | 50167      | 119310              | 1151  | 6641       | 83695                          | 372   | 43035      |
