# Supplementary material for: Climatic and socioeconomic effects on land cover changes across Europe: Does protected area designation matter?
Source: PubMed Central journal article supplement (PMC6636817; doi:10.1371/journal.pone.0219374), 2019-07-17
Supplement: pone.0219374.s004.pdf [file pone.0219374.s004.pdf]

## S4 Appendix: Correlations of model covariates

**Table A.** Correlation matrix (Pearson correlation coefficient  $r$ ) of model covariates on NUTS3 level ( $n = 1470$ )

|                   | <b>Long</b> | <b>Lat</b> | <b>PA_Prop</b> | <b>Tmax_Ch</b> | <b>Tmin_Ch</b> | <b>Precip_Ch</b> | <b>Wetfreq_Ch</b> | <b>Access</b> | <b>PopDens</b> | <b>GDP_Ch</b> | <b>Pop_Ch</b> |
|-------------------|-------------|------------|----------------|----------------|----------------|------------------|-------------------|---------------|----------------|---------------|---------------|
| <b>Long</b>       | 1           | -0.1000    | 0.1125         | -0.2086        | 0.3437         | -0.4601          | -0.1058           | 0.2767        | -0.1845        | 0.5406        | -0.3342       |
| <b>Lat</b>        | -0.1000     | 1          | -0.0988        | -0.1468        | -0.7249        | 0.2386           | 0.0754            | -0.0330       | 0.0909         | -0.0920       | -0.1206       |
| <b>PA_Prop</b>    | 0.1125      | -0.0988    | 1              | 0.0404         | 0.1487         | -0.1058          | 0.0180            | 0.0646        | -0.2261        | -0.0090       | -0.0657       |
| <b>Tmax_Ch</b>    | -0.2086     | -0.1468    | 0.0404         | 1              | -0.0751        | -0.0446          | 0.0345            | -0.0467       | -0.1351        | -0.0561       | 0.1011        |
| <b>Tmin_Ch</b>    | 0.3437      | -0.7249    | 0.1487         | -0.0751        | 1              | -0.1838          | -0.0670           | 0.0271        | -0.0745        | 0.2718        | -0.0076       |
| <b>Precip_Ch</b>  | -0.4601     | 0.2386     | -0.1058        | -0.0446        | -0.1838        | 1                | 0.6513            | -0.0463       | -0.0012        | -0.2378       | 0.0774        |
| <b>Wetfreq_Ch</b> | -0.1058     | 0.0754     | 0.0180         | 0.0345         | -0.0670        | 0.6513           | 1                 | 0.2320        | -0.2096        | -0.1242       | 0.0486        |
| <b>Access</b>     | 0.2767      | -0.0330    | 0.0646         | -0.0467        | 0.0271         | -0.0463          | 0.2320            | 1             | -0.2807        | 0.1586        | -0.1416       |
| <b>PopDens</b>    | -0.1845     | 0.0909     | -0.2261        | -0.1351        | -0.0745        | -0.0012          | -0.2096           | -0.2807       | 1              | -0.1033       | 0.0883        |
| <b>GDP_Ch</b>     | 0.5406      | -0.0920    | -0.0090        | -0.0561        | 0.2718         | -0.2378          | -0.1242           | 0.1586        | -0.1033        | 1             | -0.1357       |
| <b>Pop_Ch</b>     | -0.3342     | -0.1206    | -0.0657        | 0.1011         | -0.0076        | 0.0774           | 0.0486            | -0.1416       | 0.0883         | -0.1357       | 1             |

**Table B.** Correlation matrix (Pearson correlation coefficient  $r$ ) of model covariates on LAU level ( $n = 127102$ )

|                   | <b>Long</b> | <b>Lat</b> | <b>PA_Prop</b> | <b>Tmax_Ch</b> | <b>Tmin_Ch</b> | <b>Precip_Ch</b> | <b>Wetfreq_Ch</b> | <b>Access</b> | <b>PopDens</b> | <b>Pop_Ch</b> |
|-------------------|-------------|------------|----------------|----------------|----------------|------------------|-------------------|---------------|----------------|---------------|
| <b>Long</b>       | 1           | -0.1584    | 0.0611         | -0.0333        | 0.3771         | -0.4920          | -0.3384           | 0.2850        | -0.1780        | -0.0605       |
| <b>Lat</b>        | -0.1584     | 1          | -0.0495        | -0.1715        | -0.6917        | 0.0972           | -0.1387           | -0.1085       | 0.1799         | 0.0559        |
| <b>PA_Prop</b>    | 0.0611      | -0.0495    | 1              | 0.0253         | 0.0337         | -0.0712          | -0.0165           | 0.1272        | -0.0223        | 0.0180        |
| <b>Tmax_Ch</b>    | -0.0333     | -0.1715    | 0.0253         | 1              | -0.1257        | -0.3387          | -0.0508           | -0.0332       | -0.0100        | 0.0260        |
| <b>Tmin_Ch</b>    | 0.3771      | -0.6917    | 0.0337         | -0.1257        | 1              | 0.0213           | 0.0995            | 0.1223        | -0.1460        | -0.0377       |
| <b>Precip_Ch</b>  | -0.4920     | 0.0972     | -0.0712        | -0.3387        | 0.0213         | 1                | 0.6839            | -0.0410       | 0.0730         | 0.0452        |
| <b>Wetfreq_Ch</b> | -0.3384     | -0.1387    | -0.0165        | -0.0508        | 0.0995         | 0.6839           | 1                 | 0.1703        | -0.0551        | 0.0174        |
| <b>Access</b>     | 0.2850      | -0.1085    | 0.1272         | -0.0332        | 0.1223         | -0.0410          | 0.1703            | 1             | -0.1570        | -0.0376       |
| <b>PopDens</b>    | -0.1780     | 0.1799     | -0.0223        | -0.0100        | -0.1460        | 0.0730           | -0.0551           | -0.1570       | 1              | 0.1671        |
| <b>Pop_Ch</b>     | -0.0605     | 0.0559     | 0.0180         | 0.0260         | -0.0377        | 0.0452           | 0.0174            | -0.0376       | 0.1671         | 1             |
