# Supplementary material for: Climatic and socioeconomic effects on land cover changes across Europe: Does protected area designation matter?
Source: PubMed Central journal article supplement (PMC6636817; doi:10.1371/journal.pone.0219374), 2019-07-17
Supplement: pone.0219374.s005.pdf [file pone.0219374.s005.pdf]

## S5 Appendix: Spatial distribution of land cover flows from 2000 to 2012

**Table A.** Areas of land cover flows (LCF1-LCF6) from 2000 to 2012 (km<sup>2</sup>) per biogeographical region [38], country and area type

| Country                        | LCF1     | LCF2    | LCF3    | LCF4     | LCF5     | LCF6    | Total area<br>LCF1-LCF6 |
|--------------------------------|----------|---------|---------|----------|----------|---------|-------------------------|
| Alpine                         | 343.30   | 129.30  | 36.91   | 2135.01  | 3673.16  | 21.03   | 6338.71                 |
| Anatolian                      | 605.49   | 440.30  | 75.40   | 211.96   | 108.40   | 297.56  | 1739.11                 |
| Arctic                         | 64.88    | 18.38   | 0.00    | 71.58    | 17.63    | 251.03  | 423.50                  |
| Atlantic                       | 2909.01  | 722.55  | 464.75  | 4981.62  | 7788.88  | 58.60   | 16925.41                |
| Black Sea                      | 144.58   | 23.26   | 10.41   | 300.48   | 216.76   | 45.65   | 741.14                  |
| Boreal                         | 705.23   | 1060.67 | 393.30  | 30056.32 | 33713.40 | 4.75    | 65933.67                |
| Continental                    | 3216.25  | 1493.15 | 2201.21 | 4696.26  | 5569.08  | 176.24  | 17352.19                |
| Mediterranean                  | 4679.72  | 4299.69 | 1417.55 | 5923.28  | 10975.02 | 656.21  | 27951.47                |
| Pannonian                      | 367.28   | 747.31  | 730.63  | 2025.82  | 1626.39  | 34.83   | 5532.26                 |
| Steppic                        | 20.80    | 7.05    | 11.18   | 3.44     | 31.33    | 9.19    | 82.99                   |
| Albania                        | 292.91   | 11.17   | 8.07    | 86.89    | 309.61   | 15.35   | 724.00                  |
| Austria                        | 138.74   | 0.28    | 1.03    | 25.23    | 475.85   | 1.02    | 642.15                  |
| Belgium                        | 71.05    | 1.58    | 0.34    | 60.37    | 163.04   | 3.55    | 299.93                  |
| Bosnia and<br>Herzegovina      | 101.14   | 55.23   | 4.57    | 182.42   | 235.57   | 3.27    | 582.20                  |
| Bulgaria                       | 87.18    | 138.78  | 69.73   | 180.18   | 510.14   | 2.50    | 988.51                  |
| Croatia                        | 140.04   | 130.40  | 5.48    | 135.82   | 486.49   | 2.98    | 901.21                  |
| Cyprus                         | 130.99   | 30.36   | 14.60   | 112.03   | 30.58    | 0.40    | 318.96                  |
| Czech Republic                 | 246.80   | 220.73  | 1563.87 | 709.89   | 434.21   | 4.13    | 3179.63                 |
| Denmark                        | 192.59   | 22.80   | 15.15   | 112.35   | 128.67   | 14.24   | 485.80                  |
| Estonia                        | 91.96    | 368.52  | 283.28  | 829.78   | 982.61   | 0.53    | 2556.68                 |
| Finland                        | 217.58   | 178.32  | 0.00    | 5185.28  | 7231.67  | 0.00    | 12812.85                |
| France                         | 1654.63  | 270.75  | 55.23   | 2135.61  | 4600.37  | 19.43   | 8736.02                 |
| Germany                        | 1055.61  | 883.11  | 370.72  | 582.46   | 749.61   | 102.90  | 3744.41                 |
| Greece                         | 343.33   | 44.24   | 65.94   | 347.98   | 1029.81  | 30.66   | 1861.96                 |
| Hungary                        | 245.53   | 590.16  | 619.68  | 1880.80  | 1388.66  | 19.58   | 4744.41                 |
| Iceland                        | 65.68    | 18.69   | 0.00    | 72.29    | 17.69    | 273.78  | 448.13                  |
| Ireland                        | 218.13   | 201.11  | 358.02  | 1229.39  | 692.51   | 0.00    | 2699.16                 |
| Italy                          | 814.94   | 230.80  | 143.12  | 560.37   | 946.05   | 44.02   | 2739.30                 |
| Kosovo                         | 36.68    | 27.03   | 10.15   | 47.96    | 31.91    | 0.00    | 153.73                  |
| Latvia                         | 38.13    | 295.39  | 42.70   | 181.33   | 3112.27  | 1.01    | 3670.83                 |
| Liechtenstein                  | 0.16     | 0.00    | 0.00    | 0.00     | 0.00     | 0.00    | 0.16                    |
| Lithuania                      | 68.19    | 207.41  | 49.03   | 520.78   | 728.25   | 2.83    | 1576.49                 |
| Luxembourg                     | 8.95     | 2.59    | 1.21    | 21.41    | 3.80     | 0.00    | 37.96                   |
| Macedonia                      | 32.96    | 23.02   | 38.50   | 124.78   | 295.21   | 16.76   | 531.23                  |
| Malta                          | 0.26     | 0.00    | 0.00    | 0.00     | 0.00     | 0.00    | 0.26                    |
| Montenegro                     | 11.73    | 3.47    | 0.59    | 13.60    | 53.47    | 0.00    | 82.86                   |
| Netherlands                    | 568.76   | 25.96   | 9.90    | 168.78   | 35.94    | 24.39   | 833.73                  |
| Norway                         | 197.58   | 1.23    | 0.00    | 517.45   | 2899.68  | 0.00    | 3615.94                 |
| Poland                         | 700.12   | 180.33  | 118.61  | 1800.39  | 1548.63  | 32.36   | 4380.44                 |
| Portugal                       | 372.37   | 734.97  | 84.90   | 2532.98  | 4779.39  | 169.98  | 8674.59                 |
| Romania                        | 204.02   | 91.51   | 43.03   | 74.81    | 937.15   | 10.15   | 1360.67                 |
| Serbia                         | 75.70    | 90.81   | 59.49   | 172.13   | 195.77   | 21.52   | 615.42                  |
| Slovakia                       | 100.11   | 29.09   | 74.63   | 329.19   | 1022.39  | 0.81    | 1556.22                 |
| Slovenia                       | 15.70    | 0.09    | 0.06    | 4.12     | 21.59    | 0.53    | 42.09                   |
| Spain                          | 2317.20  | 2949.15 | 958.22  | 1929.74  | 2951.78  | 216.11  | 11322.20                |
| Sweden                         | 290.69   | 12.36   | 25.00   | 24706.46 | 20219.93 | 0.76    | 45255.20                |
| Switzerland                    | 16.92    | 0.18    | 0.18    | 11.85    | 4.38     | 0.00    | 33.51                   |
| Turkey                         | 1458.95  | 847.71  | 237.82  | 1705.71  | 2267.37  | 538.84  | 7056.40                 |
| United Kingdom                 | 450.92   | 17.83   | 3.79    | 1107.21  | 2196.16  | 3.17    | 3779.08                 |
| Protected areas                | 789.65   | 1155.84 | 717.74  | 5953.23  | 9837.36  | 324.25  | 18778.07                |
| Non-protected areas            | 12285.30 | 7781.33 | 4618.90 | 44446.63 | 53880.88 | 1253.31 | 124266.35               |
| 1 km protected area<br>buffers | 2783.85  | 1510.90 | 1009.63 | 10758.83 | 11054.13 | 157.51  | 27274.85                |
| Total                          | 13074.93 | 8937.16 | 5336.64 | 50399.82 | 63718.21 | 1577.56 | 143044.32               |

**Table B.** Areas of LCF1 (Urbanisation) from 2000 to 2012 (km<sup>2</sup>) per area type and biogeographical region [38] / country

| Biogeographical region / Country | Protected areas | Non-protected areas | 1 km protected area buffers | Total area |
|----------------------------------|-----------------|---------------------|-----------------------------|------------|
| Alpine                           | 35.71           | 307.59              | 62.59                       | 343.30     |
| Anatolian                        | 0.00            | 605.49              | 0.21                        | 605.49     |
| Arctic                           | 0.26            | 64.62               | 5.66                        | 64.88      |
| Atlantic                         | 170.40          | 2738.61             | 727.18                      | 2909.01    |
| Black Sea                        | 7.23            | 137.35              | 6.37                        | 144.58     |
| Boreal                           | 8.65            | 696.58              | 186.03                      | 705.23     |
| Continental                      | 260.89          | 2955.36             | 973.74                      | 3216.25    |
| Mediterranean                    | 292.75          | 4386.97             | 717.94                      | 4679.72    |
| Pannonian                        | 13.16           | 354.12              | 95.55                       | 367.28     |
| Steppic                          | 1.50            | 19.30               | 4.85                        | 20.80      |
| Albania                          | 19.83           | 273.08              | 11.44                       | 292.91     |
| Austria                          | 13.81           | 124.93              | 41.54                       | 138.74     |
| Belgium                          | 12.37           | 58.68               | 26.92                       | 71.05      |
| Bosnia and Herzegovina           | 0.00            | 101.14              | 1.59                        | 101.14     |
| Bulgaria                         | 19.73           | 67.45               | 15.28                       | 87.18      |
| Croatia                          | 37.85           | 102.19              | 31.46                       | 140.04     |
| Cyprus                           | 18.36           | 112.63              | 16.18                       | 130.99     |
| Czech Republic                   | 9.75            | 237.05              | 58.80                       | 246.80     |
| Denmark                          | 7.60            | 184.99              | 184.03                      | 192.59     |
| Estonia                          | 1.02            | 90.94               | 35.19                       | 91.96      |
| Finland                          | 1.58            | 216.00              | 55.47                       | 217.58     |
| France                           | 157.03          | 1497.60             | 334.20                      | 1654.63    |
| Germany                          | 101.18          | 954.43              | 549.54                      | 1055.61    |
| Greece                           | 60.85           | 282.48              | 59.77                       | 343.33     |
| Hungary                          | 9.37            | 236.16              | 70.18                       | 245.53     |
| Iceland                          | 0.26            | 65.42               | 5.73                        | 65.68      |
| Ireland                          | 2.18            | 215.95              | 57.32                       | 218.13     |
| Italy                            | 37.03           | 777.91              | 128.36                      | 814.94     |
| Kosovo                           | 0.18            | 36.50               | 2.02                        | 36.68      |
| Latvia                           | 1.30            | 36.83               | 4.90                        | 38.13      |
| Liechtenstein                    | 0.00            | 0.16                | 0.02                        | 0.16       |
| Lithuania                        | 3.54            | 64.65               | 18.29                       | 68.19      |
| Luxembourg                       | 1.25            | 7.70                | 5.36                        | 8.95       |
| Macedonia                        | 0.10            | 32.86               | 1.49                        | 32.96      |
| Malta                            | 0.00            | 0.26                | 0.26                        | 0.26       |
| Montenegro                       | 0.00            | 11.73               | 0.05                        | 11.73      |
| Netherlands                      | 9.08            | 559.68              | 82.36                       | 568.76     |
| Norway                           | 0.33            | 197.25              | 22.60                       | 197.58     |
| Poland                           | 101.36          | 598.76              | 162.09                      | 700.12     |
| Portugal                         | 32.46           | 339.91              | 39.62                       | 372.37     |
| Romania                          | 6.05            | 197.97              | 28.74                       | 204.02     |
| Serbia                           | 0.28            | 75.42               | 4.59                        | 75.70      |
| Slovakia                         | 7.13            | 92.98               | 30.92                       | 100.11     |
| Slovenia                         | 3.99            | 11.71               | 7.87                        | 15.70      |
| Spain                            | 90.86           | 2226.34             | 474.74                      | 2317.20    |
| Sweden                           | 1.77            | 288.92              | 84.76                       | 290.69     |
| Switzerland                      | 0.29            | 16.63               | 6.83                        | 16.92      |
| Turkey                           | 0.32            | 1458.63             | 0.54                        | 1458.95    |
| United Kingdom                   | 19.54           | 431.38              | 122.80                      | 450.92     |
| Total                            | 789.65          | 12285.30            | 2783.85                     | 13074.93   |

**Table C.** Areas of LCF2 (Intensification of agriculture) from 2000 to 2012 (km<sup>2</sup>) per area type and biogeographical region [38] / country

| Biogeographical region /<br>Country | Protected areas | Non-protected<br>areas | 1 km protected<br>area buffers | Total area |
|-------------------------------------|-----------------|------------------------|--------------------------------|------------|
| Alpine                              | 39.98           | 89.32                  | 17.55                          | 129.30     |
| Anatolian                           | 0.00            | 440.30                 | 0.12                           | 440.30     |
| Arctic                              | 0.00            | 18.38                  | 0.00                           | 18.38      |
| Atlantic                            | 80.41           | 642.14                 | 204.63                         | 722.55     |
| Black Sea                           | 5.12            | 18.14                  | 2.42                           | 23.26      |
| Boreal                              | 31.58           | 1029.09                | 231.84                         | 1060.67    |
| Continental                         | 348.98          | 1144.17                | 339.61                         | 1493.15    |
| Mediterranean                       | 556.02          | 3743.67                | 519.71                         | 4299.69    |
| Pannonian                           | 93.87           | 653.44                 | 195.89                         | 747.31     |
| Steppic                             | 0.28            | 6.77                   | 1.34                           | 7.05       |
| Albania                             | 0.23            | 10.94                  | 1.44                           | 11.17      |
| Austria                             | 0.00            | 0.28                   | 0.11                           | 0.28       |
| Belgium                             | 0.10            | 1.48                   | 0.47                           | 1.58       |
| Bosnia and Herzegovina              | 0.00            | 55.23                  | 0.24                           | 55.23      |
| Bulgaria                            | 31.65           | 107.13                 | 36.96                          | 138.78     |
| Croatia                             | 55.73           | 74.67                  | 23.61                          | 130.40     |
| Cyprus                              | 15.31           | 15.05                  | 4.20                           | 30.36      |
| Czech Republic                      | 38.53           | 182.20                 | 51.76                          | 220.73     |
| Denmark                             | 5.74            | 17.06                  | 17.06                          | 22.80      |
| Estonia                             | 6.71            | 361.81                 | 148.76                         | 368.52     |
| Finland                             | 2.33            | 175.99                 | 18.43                          | 178.32     |
| France                              | 44.26           | 226.49                 | 38.64                          | 270.75     |
| Germany                             | 248.36          | 634.75                 | 296.43                         | 883.11     |
| Greece                              | 17.28           | 26.96                  | 8.50                           | 44.24      |
| Hungary                             | 79.48           | 510.68                 | 167.63                         | 590.16     |
| Iceland                             | 0.18            | 18.51                  | 0.02                           | 18.69      |
| Ireland                             | 2.45            | 198.66                 | 43.76                          | 201.11     |
| Italy                               | 22.71           | 208.09                 | 31.27                          | 230.80     |
| Kosovo                              | 0.00            | 27.03                  | 0.63                           | 27.03      |
| Latvia                              | 8.84            | 286.55                 | 24.92                          | 295.39     |
| Liechtenstein                       | 0.00            | 0.00                   | 0.00                           | 0.00       |
| Lithuania                           | 12.38           | 195.03                 | 37.55                          | 207.41     |
| Luxembourg                          | 0.77            | 1.82                   | 1.45                           | 2.59       |
| Macedonia                           | 0.00            | 23.02                  | 0.31                           | 23.02      |
| Malta                               | 0.00            | 0.00                   | 0.00                           | 0.00       |
| Montenegro                          | 0.00            | 3.47                   | 0.06                           | 3.47       |
| Netherlands                         | 0.29            | 25.67                  | 3.61                           | 25.96      |
| Norway                              | 0.00            | 1.23                   | 0.00                           | 1.23       |
| Poland                              | 43.58           | 136.75                 | 29.43                          | 180.33     |
| Portugal                            | 144.95          | 590.02                 | 41.02                          | 734.97     |
| Romania                             | 15.18           | 76.33                  | 12.74                          | 91.51      |
| Serbia                              | 2.30            | 88.51                  | 8.29                           | 90.81      |
| Slovakia                            | 3.75            | 25.34                  | 7.84                           | 29.09      |
| Slovenia                            | 0.00            | 0.09                   | 0.09                           | 0.09       |
| Spain                               | 344.50          | 2604.65                | 444.65                         | 2949.15    |
| Sweden                              | 2.83            | 9.53                   | 3.54                           | 12.36      |
| Switzerland                         | 0.00            | 0.18                   | 0.00                           | 0.18       |
| Turkey                              | 1.07            | 846.64                 | 1.30                           | 847.71     |
| United Kingdom                      | 4.34            | 13.49                  | 4.18                           | 17.83      |
| Total                               | 1155.84         | 7781.33                | 1510.90                        | 8937.16    |

**Table D.** Areas of LCF3 (Extensification of agriculture) from 2000 to 2012 (km<sup>2</sup>) per area type and biogeographical region [38] / country

| Biogeographical region /<br>Country | Protected areas | Non-protected<br>areas | 1 km protected<br>area buffers | Total area     |
|-------------------------------------|-----------------|------------------------|--------------------------------|----------------|
| Alpine                              | 10.26           | 26.65                  | 5.24                           | 36.91          |
| Anatolian                           | 0.00            | 75.40                  | 1.31                           | 75.40          |
| Arctic                              | 0.00            | 0.00                   | 0.00                           | 0.00           |
| Atlantic                            | 31.39           | 433.36                 | 98.64                          | 464.75         |
| Black Sea                           | 3.41            | 7.00                   | 3.52                           | 10.41          |
| Boreal                              | 26.57           | 366.73                 | 131.57                         | 393.30         |
| Continental                         | 419.98          | 1781.23                | 443.56                         | 2201.21        |
| Mediterranean                       | 87.15           | 1330.40                | 150.11                         | 1417.55        |
| Pannonian                           | 139.15          | 591.48                 | 176.61                         | 730.63         |
| Steppic                             | 0.00            | 11.18                  | 1.35                           | 11.18          |
| Albania                             | 2.12            | 5.95                   | 0.16                           | 8.07           |
| Austria                             | 0.22            | 0.81                   | 0.44                           | 1.03           |
| Belgium                             | 0.01            | 0.33                   | 0.00                           | 0.34           |
| Bosnia and Herzegovina              | 0.00            | 4.57                   | 0.36                           | 4.57           |
| Bulgaria                            | 8.71            | 61.02                  | 22.59                          | 69.73          |
| Croatia                             | 0.28            | 5.20                   | 0.42                           | 5.48           |
| Cyprus                              | 3.26            | 11.34                  | 1.00                           | 14.60          |
| Czech Republic                      | 248.84          | 1315.03                | 285.13                         | 1563.87        |
| Denmark                             | 3.05            | 12.10                  | 12.10                          | 15.15          |
| Estonia                             | 9.94            | 273.34                 | 113.67                         | 283.28         |
| Finland                             | 0.00            | 0.00                   | 0.00                           | 0.00           |
| France                              | 6.64            | 48.59                  | 12.82                          | 55.23          |
| Germany                             | 130.96          | 239.76                 | 125.56                         | 370.72         |
| Greece                              | 6.12            | 59.82                  | 16.64                          | 65.94          |
| Hungary                             | 125.41          | 494.27                 | 152.11                         | 619.68         |
| Iceland                             | 0.00            | 0.00                   | 0.00                           | 0.00           |
| Ireland                             | 7.03            | 350.99                 | 64.83                          | 358.02         |
| Italy                               | 4.77            | 138.35                 | 8.46                           | 143.12         |
| Kosovo                              | 0.00            | 10.15                  | 0.09                           | 10.15          |
| Latvia                              | 7.11            | 35.59                  | 3.72                           | 42.70          |
| Liechtenstein                       | 0.00            | 0.00                   | 0.00                           | 0.00           |
| Lithuania                           | 7.51            | 41.52                  | 8.93                           | 49.03          |
| Luxembourg                          | 0.00            | 1.21                   | 0.84                           | 1.21           |
| Macedonia                           | 0.00            | 38.50                  | 0.26                           | 38.50          |
| Malta                               | 0.00            | 0.00                   | 0.00                           | 0.00           |
| Montenegro                          | 0.00            | 0.59                   | 0.00                           | 0.59           |
| Netherlands                         | 0.46            | 9.44                   | 0.42                           | 9.90           |
| Norway                              | 0.00            | 0.00                   | 0.00                           | 0.00           |
| Poland                              | 47.79           | 70.82                  | 19.45                          | 118.61         |
| Portugal                            | 7.93            | 76.97                  | 4.80                           | 84.90          |
| Romania                             | 2.12            | 40.91                  | 4.50                           | 43.03          |
| Serbia                              | 1.40            | 58.09                  | 6.56                           | 59.49          |
| Slovakia                            | 18.07           | 56.56                  | 14.56                          | 74.63          |
| Slovenia                            | 0.00            | 0.06                   | 0.00                           | 0.06           |
| Spain                               | 63.17           | 895.05                 | 119.85                         | 958.22         |
| Sweden                              | 3.86            | 21.14                  | 7.06                           | 25.00          |
| Switzerland                         | 0.00            | 0.18                   | 0.01                           | 0.18           |
| Turkey                              | 0.00            | 237.82                 | 1.42                           | 237.82         |
| United Kingdom                      | 0.96            | 2.83                   | 0.87                           | 3.79           |
| <b>Total</b>                        | <b>717.74</b>   | <b>4618.90</b>         | <b>1009.63</b>                 | <b>5336.64</b> |

**Table E.** Areas of LCF4 (Afforestation) from 2000 to 2012 (km<sup>2</sup>) per area type and biogeographical region [38] / country

| Biogeographical region / Country | Protected areas | Non-protected areas | 1 km protected area buffers | Total area |
|----------------------------------|-----------------|---------------------|-----------------------------|------------|
| Alpine                           | 419.84          | 1715.17             | 356.16                      | 2135.01    |
| Anatolian                        | 1.07            | 210.89              | 0.59                        | 211.96     |
| Arctic                           | 0.59            | 70.99               | 3.41                        | 71.58      |
| Atlantic                         | 1065.52         | 3916.10             | 1028.42                     | 4981.62    |
| Black Sea                        | 7.19            | 293.29              | 1.13                        | 300.48     |
| Boreal                           | 737.59          | 29318.73            | 7564.48                     | 30056.32   |
| Continental                      | 2027.54         | 2668.72             | 813.43                      | 4696.26    |
| Mediterranean                    | 1327.55         | 4595.73             | 535.99                      | 5923.28    |
| Pannonian                        | 369.39          | 1656.43             | 458.98                      | 2025.82    |
| Steppic                          | 2.48            | 0.96                | 0.00                        | 3.44       |
| Albania                          | 20.96           | 65.93               | 11.64                       | 86.89      |
| Austria                          | 4.94            | 20.29               | 7.47                        | 25.23      |
| Belgium                          | 32.73           | 27.64               | 19.36                       | 60.37      |
| Bosnia and Herzegovina           | 0.06            | 182.36              | 2.47                        | 182.42     |
| Bulgaria                         | 78.82           | 101.36              | 17.93                       | 180.18     |
| Croatia                          | 74.20           | 61.62               | 13.46                       | 135.82     |
| Cyprus                           | 47.78           | 64.25               | 22.45                       | 112.03     |
| Czech Republic                   | 302.01          | 407.88              | 97.61                       | 709.89     |
| Denmark                          | 15.95           | 96.40               | 96.34                       | 112.35     |
| Estonia                          | 100.90          | 728.88              | 406.93                      | 829.78     |
| Finland                          | 159.42          | 5025.86             | 950.17                      | 5185.28    |
| France                           | 729.96          | 1405.65             | 388.84                      | 2135.61    |
| Germany                          | 279.70          | 302.76              | 158.65                      | 582.46     |
| Greece                           | 165.51          | 182.47              | 48.50                       | 347.98     |
| Hungary                          | 315.55          | 1565.25             | 433.48                      | 1880.80    |
| Iceland                          | 0.59            | 71.70               | 3.41                        | 72.29      |
| Ireland                          | 210.49          | 1018.90             | 290.77                      | 1229.39    |
| Italy                            | 193.24          | 367.13              | 103.24                      | 560.37     |
| Kosovo                           | 3.27            | 44.69               | 1.75                        | 47.96      |
| Latvia                           | 18.28           | 163.05              | 18.88                       | 181.33     |
| Liechtenstein                    | 0.00            | 0.00                | 0.00                        | 0.00       |
| Lithuania                        | 131.48          | 389.30              | 93.94                       | 520.78     |
| Luxembourg                       | 14.02           | 7.39                | 5.64                        | 21.41      |
| Macedonia                        | 14.78           | 110.00              | 5.69                        | 124.78     |
| Malta                            | 0.00            | 0.00                | 0.00                        | 0.00       |
| Montenegro                       | 0.00            | 13.60               | 0.00                        | 13.60      |
| Netherlands                      | 40.86           | 127.92              | 26.85                       | 168.78     |
| Norway                           | 6.20            | 511.25              | 53.63                       | 517.45     |
| Poland                           | 1040.04         | 760.35              | 255.10                      | 1800.39    |
| Portugal                         | 504.64          | 2028.34             | 164.21                      | 2532.98    |
| Romania                          | 22.40           | 52.41               | 7.74                        | 74.81      |
| Serbia                           | 42.13           | 130.00              | 10.87                       | 172.13     |
| Slovakia                         | 187.34          | 141.85              | 45.70                       | 329.19     |
| Slovenia                         | 2.92            | 1.20                | 1.03                        | 4.12       |
| Spain                            | 516.75          | 1412.99             | 337.99                      | 1929.74    |
| Sweden                           | 471.21          | 24235.25            | 6426.91                     | 24706.46   |
| Switzerland                      | 1.66            | 10.19               | 6.75                        | 11.85      |
| Turkey                           | 7.45            | 1698.26             | 6.57                        | 1705.71    |
| United Kingdom                   | 194.98          | 912.23              | 216.85                      | 1107.21    |
| Total                            | 5953.23         | 44446.63            | 10758.83                    | 50399.82   |

**Table F.** Areas of LCF5 (Deforestation) from 2000 to 2012 (km<sup>2</sup>) per area type and biogeographical region [38] / country

| Biogeographical region / Country | Protected areas | Non-protected areas | 1 km protected area buffers | Total area |
|----------------------------------|-----------------|---------------------|-----------------------------|------------|
| Alpine                           | 1349.86         | 2323.30             | 413.41                      | 3673.16    |
| Anatolian                        | 0.00            | 108.40              | 0.00                        | 108.40     |
| Arctic                           | 0.34            | 17.29               | 0.24                        | 17.63      |
| Atlantic                         | 2021.06         | 5767.82             | 1666.35                     | 7788.88    |
| Black Sea                        | 15.28           | 201.48              | 3.87                        | 216.76     |
| Boreal                           | 924.59          | 32788.81            | 6854.86                     | 33713.40   |
| Continental                      | 2483.84         | 3085.24             | 834.76                      | 5569.08    |
| Mediterranean                    | 2439.00         | 8536.02             | 994.42                      | 10975.02   |
| Pannonian                        | 581.97          | 1044.42             | 288.39                      | 1626.39    |
| Steppic                          | 24.14           | 7.19                | 1.28                        | 31.33      |
| Albania                          | 35.62           | 273.99              | 21.04                       | 309.61     |
| Austria                          | 132.82          | 343.03              | 93.59                       | 475.85     |
| Belgium                          | 89.55           | 73.49               | 54.24                       | 163.04     |
| Bosnia and Herzegovina           | 0.08            | 235.49              | 5.82                        | 235.57     |
| Bulgaria                         | 201.03          | 309.11              | 72.14                       | 510.14     |
| Croatia                          | 239.54          | 246.95              | 64.70                       | 486.49     |
| Cyprus                           | 25.69           | 4.89                | 3.99                        | 30.58      |
| Czech Republic                   | 192.34          | 241.87              | 48.30                       | 434.21     |
| Denmark                          | 33.51           | 95.16               | 94.56                       | 128.67     |
| Estonia                          | 21.87           | 960.74              | 478.08                      | 982.61     |
| Finland                          | 178.17          | 7053.50             | 1199.98                     | 7231.67    |
| France                           | 1735.86         | 2864.51             | 862.30                      | 4600.37    |
| Germany                          | 489.35          | 260.26              | 128.58                      | 749.61     |
| Greece                           | 334.61          | 695.20              | 145.14                      | 1029.81    |
| Hungary                          | 505.16          | 883.50              | 245.38                      | 1388.66    |
| Iceland                          | 0.34            | 17.35               | 0.24                        | 17.69      |
| Ireland                          | 122.17          | 570.34              | 221.79                      | 692.51     |
| Italy                            | 309.06          | 636.99              | 159.27                      | 946.05     |
| Kosovo                           | 0.84            | 31.07               | 0.19                        | 31.91      |
| Latvia                           | 358.32          | 2753.95             | 335.34                      | 3112.27    |
| Liechtenstein                    | 0.00            | 0.00                | 0.00                        | 0.00       |
| Lithuania                        | 154.83          | 573.42              | 104.58                      | 728.25     |
| Luxembourg                       | 2.68            | 1.12                | 0.75                        | 3.80       |
| Macedonia                        | 7.74            | 287.47              | 11.43                       | 295.21     |
| Malta                            | 0.00            | 0.00                | 0.00                        | 0.00       |
| Montenegro                       | 0.04            | 53.43               | 0.05                        | 53.47      |
| Netherlands                      | 17.76           | 18.18               | 1.66                        | 35.94      |
| Norway                           | 14.02           | 2885.66             | 250.45                      | 2899.68    |
| Poland                           | 921.82          | 626.81              | 182.01                      | 1548.63    |
| Portugal                         | 818.99          | 3960.40             | 322.54                      | 4779.39    |
| Romania                          | 432.23          | 504.92              | 94.88                       | 937.15     |
| Serbia                           | 48.61           | 147.16              | 17.32                       | 195.77     |
| Slovakia                         | 713.22          | 309.17              | 92.26                       | 1022.39    |
| Slovenia                         | 16.96           | 4.63                | 2.96                        | 21.59      |
| Spain                            | 960.43          | 1991.35             | 507.51                      | 2951.78    |
| Sweden                           | 239.95          | 19979.98            | 4722.81                     | 20219.93   |
| Switzerland                      | 0.11            | 4.27                | 2.09                        | 4.38       |
| Turkey                           | 0.01            | 2267.36             | 3.78                        | 2267.37    |
| United Kingdom                   | 482.03          | 1714.13             | 502.36                      | 2196.16    |
| Total                            | 9837.36         | 53880.88            | 11054.13                    | 63718.21   |

**Table G.** Areas of LCF6 (Formation of water bodies) from 2000 to 2012 (km<sup>2</sup>) per area type and biogeographical region [38] / country

| Biogeographical region /<br>Country | Protected areas | Non-protected<br>areas | 1 km protected<br>area buffers | Total area     |
|-------------------------------------|-----------------|------------------------|--------------------------------|----------------|
| Alpine                              | 2.26            | 18.77                  | 2.05                           | 21.03          |
| Anatolian                           | 0.00            | 297.56                 | 0.00                           | 297.56         |
| Arctic                              | 66.67           | 184.36                 | 29.60                          | 251.03         |
| Atlantic                            | 17.44           | 41.16                  | 12.94                          | 58.60          |
| Black Sea                           | 0.00            | 45.65                  | 0.36                           | 45.65          |
| Boreal                              | 0.88            | 3.87                   | 0.71                           | 4.75           |
| Continental                         | 79.35           | 96.89                  | 36.43                          | 176.24         |
| Mediterranean                       | 141.60          | 514.61                 | 70.26                          | 656.21         |
| Pannonian                           | 6.86            | 27.97                  | 4.76                           | 34.83          |
| Steppic                             | 9.18            | 0.01                   | 0.01                           | 9.19           |
| Albania                             | 5.24            | 10.11                  | 0.70                           | 15.35          |
| Austria                             | 0.60            | 0.42                   | 0.13                           | 1.02           |
| Belgium                             | 0.47            | 3.08                   | 2.30                           | 3.55           |
| Bosnia and Herzegovina              | 0.00            | 3.27                   | 0.04                           | 3.27           |
| Bulgaria                            | 1.08            | 1.42                   | 0.78                           | 2.50           |
| Croatia                             | 0.92            | 2.06                   | 0.10                           | 2.98           |
| Cyprus                              | 0.35            | 0.05                   | 0.05                           | 0.40           |
| Czech Republic                      | 0.49            | 3.64                   | 0.50                           | 4.13           |
| Denmark                             | 13.87           | 0.37                   | 0.37                           | 14.24          |
| Estonia                             | 0.25            | 0.28                   | 0.05                           | 0.53           |
| Finland                             | 0.00            | 0.00                   | 0.00                           | 0.00           |
| France                              | 5.52            | 13.91                  | 5.38                           | 19.43          |
| Germany                             | 47.89           | 55.01                  | 29.04                          | 102.90         |
| Greece                              | 16.30           | 14.36                  | 6.98                           | 30.66          |
| Hungary                             | 6.27            | 13.31                  | 3.51                           | 19.58          |
| Iceland                             | 66.67           | 207.11                 | 29.99                          | 273.78         |
| Ireland                             | 0.00            | 0.00                   | 0.00                           | 0.00           |
| Italy                               | 31.04           | 12.98                  | 2.41                           | 44.02          |
| Kosovo                              | 0.00            | 0.00                   | 0.00                           | 0.00           |
| Latvia                              | 0.06            | 0.95                   | 0.00                           | 1.01           |
| Liechtenstein                       | 0.00            | 0.00                   | 0.00                           | 0.00           |
| Lithuania                           | 0.57            | 2.26                   | 0.47                           | 2.83           |
| Luxembourg                          | 0.00            | 0.00                   | 0.00                           | 0.00           |
| Macedonia                           | 0.60            | 16.16                  | 0.96                           | 16.76          |
| Malta                               | 0.00            | 0.00                   | 0.00                           | 0.00           |
| Montenegro                          | 0.00            | 0.00                   | 0.00                           | 0.00           |
| Netherlands                         | 4.27            | 20.12                  | 2.84                           | 24.39          |
| Norway                              | 0.00            | 0.00                   | 0.00                           | 0.00           |
| Poland                              | 12.81           | 19.55                  | 6.19                           | 32.36          |
| Portugal                            | 22.74           | 147.24                 | 14.87                          | 169.98         |
| Romania                             | 10.02           | 0.13                   | 0.09                           | 10.15          |
| Serbia                              | 1.37            | 20.15                  | 0.96                           | 21.52          |
| Slovakia                            | 0.18            | 0.63                   | 0.41                           | 0.81           |
| Slovenia                            | 0.07            | 0.46                   | 0.08                           | 0.53           |
| Spain                               | 73.71           | 142.40                 | 46.30                          | 216.11         |
| Sweden                              | 0.08            | 0.68                   | 0.19                           | 0.76           |
| Switzerland                         | 0.00            | 0.00                   | 0.00                           | 0.00           |
| Turkey                              | 0.00            | 538.84                 | 0.41                           | 538.84         |
| United Kingdom                      | 0.81            | 2.36                   | 1.41                           | 3.17           |
| <b>Total</b>                        | <b>324.25</b>   | <b>1253.31</b>         | <b>157.51</b>                  | <b>1577.56</b> |
